# Supplementary material
Source: PubMed Central journal article supplement (PMC3838882)

# **(3-Aminopropyl)-4-methylpiperazine End-capped Poly(1,4-butanediol diacrylate-co-4-amino-1-butanol)-based Multilayer Films for Gene Delivery**

*Cuicui Li<sup>a,b</sup>, Stephany Y Tzeng<sup>a</sup>, Liane E. Tellier<sup>a</sup>, Jordan J Green<sup>a</sup>*

<sup>a</sup> Department of Biomedical Engineering, the Wilmer Eye Institute, the Institute for Nanobiotechnology, and the Translational Tissue Engineering Center, Johns Hopkins University School of Medicine, Baltimore, MD 21231, USA

<sup>b</sup> Department of System Life Sciences, Graduate School of Engineering, Kyushu University, Motooka 744, Fukuoka 819-0395, Japan

## **SUPPORTING INFORMATION**

### **Gel Permeation Chromatography (GPC)**

Table 1. Number-averaged (Mn) and weight-averaged (Mw) molecular weight and polydispersity index (PDI) measured by gel permeation chromatography. The average number of subunits per chain was estimated by dividing Mn by the molecular weight of the repeat unit.

| Polymer        | Mn (Da) | Mw (Da) | PDI  | Subunits/chain (average) |
|----------------|---------|---------|------|--------------------------|
| B4-S4-E7 (447) | 11424   | 37679   | 3.30 | 40                       |
| B4-SP (4P)     | 48698   | 113421  | 2.33 | 120                      |

## Nuclear Magnetic Resonance (NMR)

### B4-S4-E7 (447):

- 1.45-1.6 (m,  $\text{NCH}_2\text{CH}_2\text{CH}_2\text{CH}_2\text{OH}$  and  $\text{NCH}_2\text{CH}_2\text{CH}_2\text{CH}_2\text{OH}$  and t,  $\text{NCH}_2\text{CH}_2\text{CH}_2\text{N} < (\text{CH}_2\text{CH}_2)_2 > \text{NCH}_3$ )  
1.6-1.75 (t,  $\text{COOCH}_2\text{CH}_2\text{CH}_2\text{OOC}$ )  
2.3 (s,  $\text{NCH}_2\text{CH}_2\text{CH}_2\text{N} < (\text{CH}_2\text{CH}_2)_2 > \text{NCH}_3$ )  
2.35-2.6 (t,  $\text{COOCH}_2\text{CH}_2\text{NCH}_2\text{CH}_2\text{OOC}$  and t,  $\text{NCH}_2\text{CH}_2\text{CH}_2\text{CH}_2\text{OH}$  and m,  $\text{NCH}_2\text{CH}_2\text{CH}_2\text{N} < (\text{CH}_2\text{CH}_2)_2 > \text{NCH}_3$ )  
2.7-2.85 (t,  $\text{COOCH}_2\text{CH}_2\text{NCH}_2\text{CH}_2\text{OOC}$ )  
3.55-3.7 (t,  $\text{NCH}_2\text{CH}_2\text{CH}_2\text{CH}_2\text{OH}$ )  
4.0-4.2 (t,  $\text{COOCH}_2\text{CH}_2\text{CH}_2\text{CH}_2\text{OOC}$ )

### B4-SP (4P):

- 1.05-1.35 (m,  $\text{N} < (\text{CH}_{\text{eq}}\text{H}_{\text{ax}}\text{CH}_{\text{eq}}\text{H}_{\text{ax}})_2 > \text{CHCH}_2\text{CH}_2\text{CH}_2\text{CH} < (\text{CH}_{\text{eq}}\text{H}_{\text{ax}}\text{CH}_{\text{eq}}\text{H}_{\text{ax}})_2 > \text{N}$ )  
1.55-1.75 (m,  $\text{COOCH}_2\text{CH}_2\text{CH}_2\text{OOC}$ ,  
 $\text{N} < (\text{CH}_{\text{eq}}\text{H}_{\text{ax}}\text{CH}_{\text{eq}}\text{H}_{\text{ax}})_2 > \text{CHCH}_2\text{CH}_2\text{CH}_2\text{CH} < (\text{CH}_{\text{eq}}\text{H}_{\text{ax}}\text{CH}_{\text{eq}}\text{H}_{\text{ax}})_2 > \text{N}$ )  
1.8-2.05 (t,  $\text{OOCCH}_2\text{CH}_2\text{N}$ )  
2.45-2.55 (t,  $\text{N} < (\text{CH}_{\text{eq}}\text{H}_{\text{ax}}\text{CH}_{\text{eq}}\text{H}_{\text{ax}})_2 > \text{CHCH}_2\text{CH}_2\text{CH}_2\text{CH} < (\text{CH}_{\text{eq}}\text{H}_{\text{ax}}\text{CH}_{\text{eq}}\text{H}_{\text{ax}})_2 > \text{N}$ )  
2.6-2.7 (t,  $\text{OOCCH}_2\text{CH}_2\text{N}$ )  
2.8-2.9 (dt,  $\text{N} < (\text{CH}_{\text{eq}}\text{H}_{\text{ax}}\text{CH}_{\text{eq}}\text{H}_{\text{ax}})_2 > \text{CHCH}_2\text{CH}_2\text{CH}_2\text{CH} < (\text{CH}_{\text{eq}}\text{H}_{\text{ax}}\text{CH}_{\text{eq}}\text{H}_{\text{ax}})_2 > \text{N}$ )  
4.05-4.15 (t,  $\text{COOCH}_2\text{CH}_2\text{CH}_2\text{CH}_2\text{OOC}$ )  
5.75-5.8 (s,  $\text{CH}_2\text{OOCCH}=\text{CHH}$ )  
5.9-5.95 (s,  $\text{CH}_2\text{OOCCH}=\text{CHH}$ )  
6.05-6.1 (s,  $\text{CH}_2\text{OOCCH}=\text{CHH}$ )

Note: acrylate protons (5.75-6.1) appear very small because they are low in frequency compared to other protons in the backbone. GPC estimates ~120 subunits per polymer chain on average; for example, each acrylate peak is estimated to be >240 times smaller than the backbone peak at 4.05-4.15.

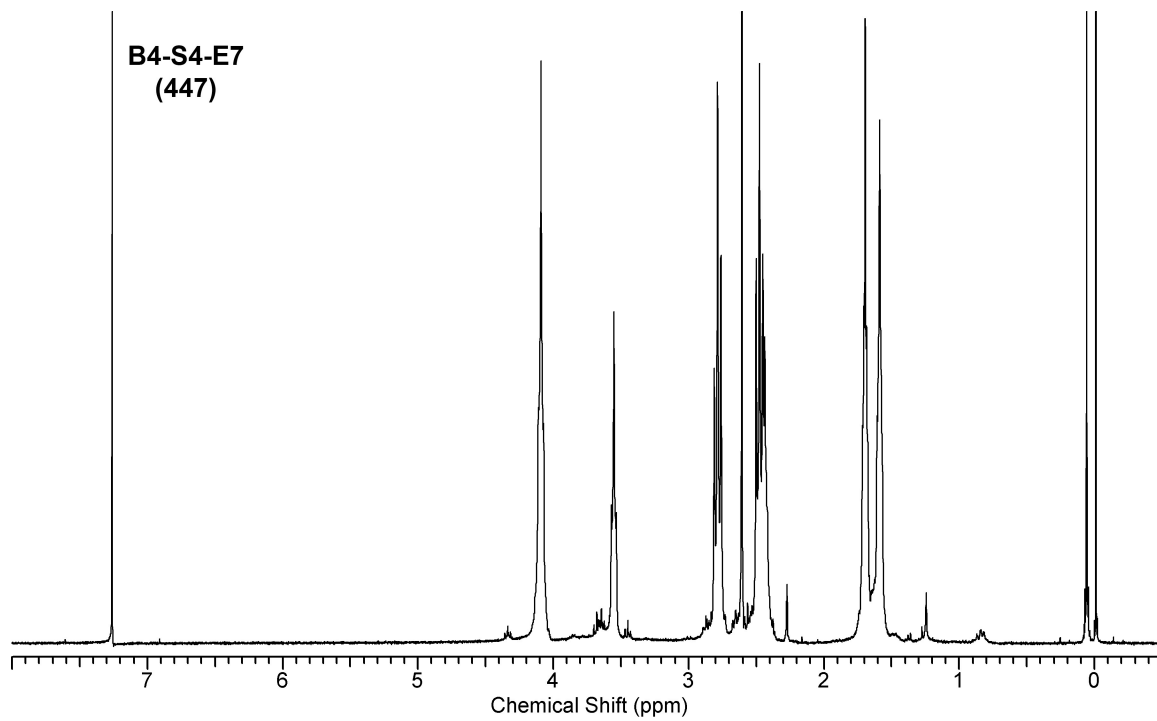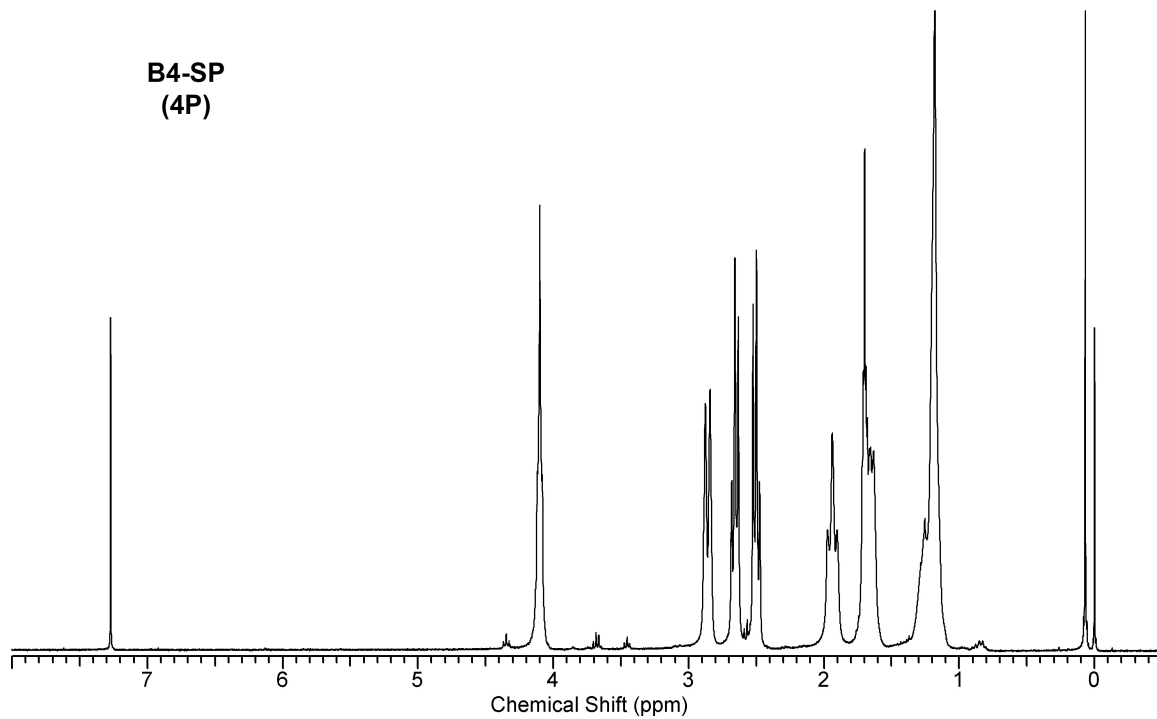

Supplement: NIHMS498405-supplement-1_si_001.pdf [file NIHMS498405-supplement-1_si_001.pdf]
